# Supplementary material
Source: PubMed Central journal article supplement (PMC3401583)
Supplement: NIHMS374078-supplement.pdf [file NIHMS374078-supplement.pdf]

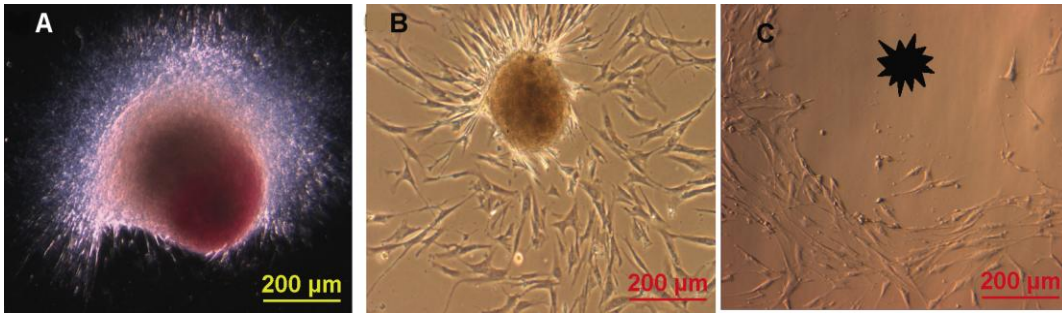

**Supplemental Figure 1. Differential growth and polarization of ASC spheroids grown in suspension culture.**

ASC spheroids were prepared using cells pre-labeled with fluorescent dye (DiI). Initially, the spheroids were small and spherical (A (bright light); and B (fluorescent)), but when maintained in growth factor enriched serum-free medium (HGFM-SF), the spheroid grew and polarized (C and D). Note the intense fluorescent pole (star) that remains even after extensive growth of the spheroid. ASC spheroids demonstrate differential growth in suspension culture depending on the specific culture conditions. Image E illustrates smaller, circular spheroids (blue arrows) with uniform red fluorescence that have been grown in traditional DMEM medium with 10% FBS (D-10). These are in stark contrast to the large spheroids (green arrows) grown in HGFM-SF medium. The ‘starting’ DiI cells are still visible as an intense red ‘core’, surrounded by new-growth cells and matrix with a diluted (absent) fluorescent signal.

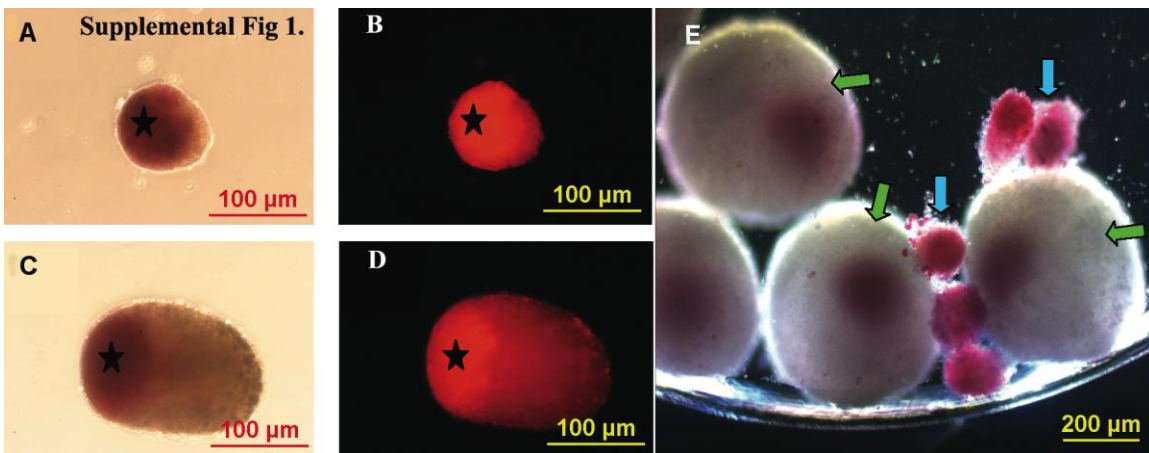

**Supplemental Figure 2. Differentiation of human ASC spheroids after placement in adherent culture.**

ASC spheroids were cultured for 4 weeks in serum-free suspension culture, and then placed into adherent culture (tissue culture plastic). After 4 days in adherent culture the cells were exposed to adipogenic, chondrogenic or osteogenic induction media for 2 weeks. Spheroids were then fixed and stained with Alcian Blue for chondrogenesis (top images), Alizarin Red for osteogenesis (middle images), or Oil Red O for adipogenesis (bottom images). Note the presence of free lipid droplets in the medium (arrow) in lower images, indicative of adipogenic differentiation.

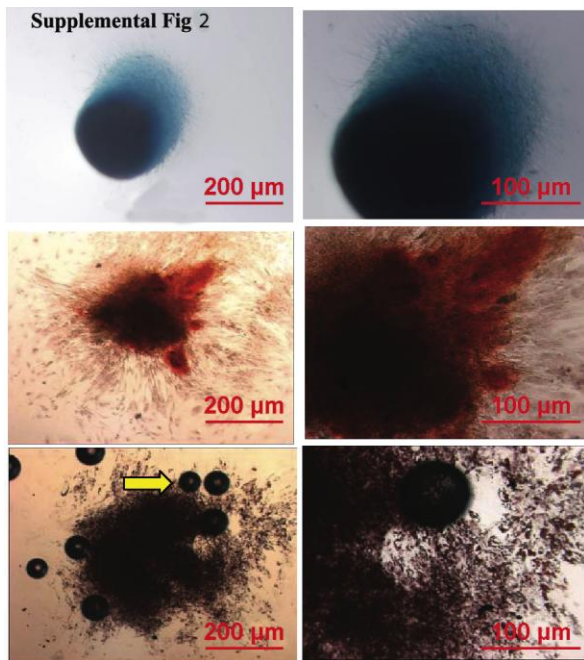

**Supplemental Figure 3. Differentiation of 2-D monolayer ASCs derived from adherent, serially passaged spheroids.**

Human ASCs were maintained for 12 days in serum-free suspension culture (HGFM-SF), and then placed into adherent culture (tissue culture plastic) in D-10 medium. The adherent spheroids were passaged every 3-4 days to new culture wells 10 separate times. Passage 10 spheroid-derived cells were then expanded to near-confluence in D-10 medium over 6 weeks. The

expanded P10 cells were then cultured in either adipogenic or osteogenic induction media for 2 weeks. Cells were then fixed and stained with Alizarin Red for osteogenesis (top images), or Oil Red O for adipogenesis (bottom images). Images on left show the entire culture well, while images on right show representative microscopic view.

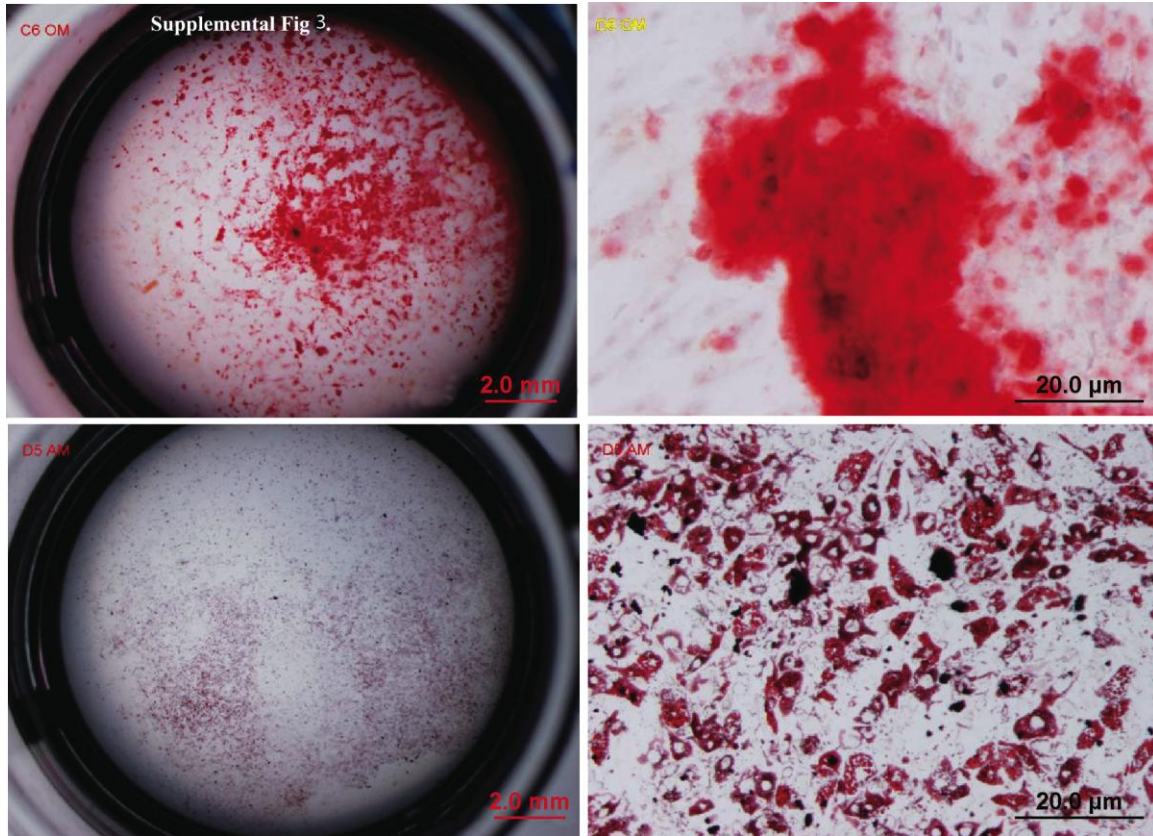

**Supplemental Figure 4:** Standard Curve Graph for SYBR-490: Adipogenic Markers

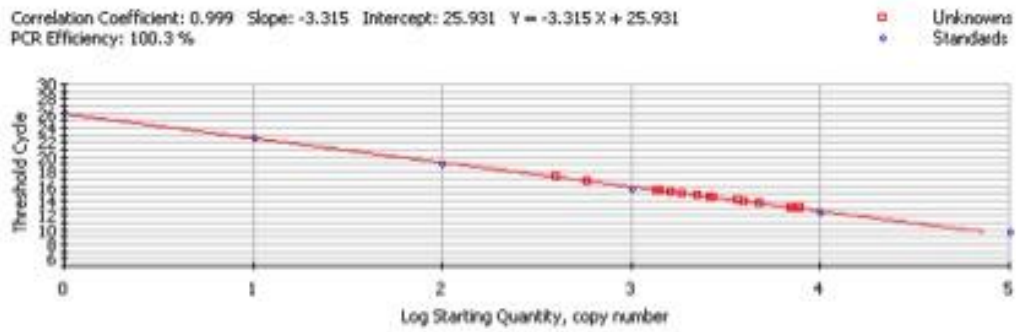

**Supplemental Figure 5:** Standard Curve Graph for SYBR-490: Osteogenic Markers

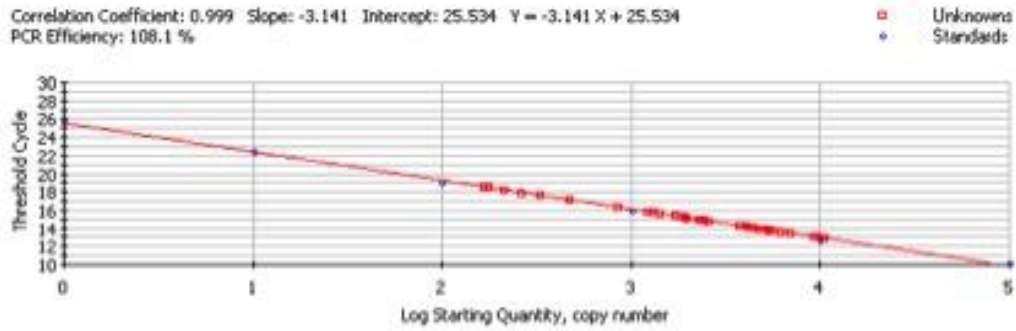

**Supplemental Figure 6:** Standard Curve Graph for SYBR-490: Chondrogenic Markers

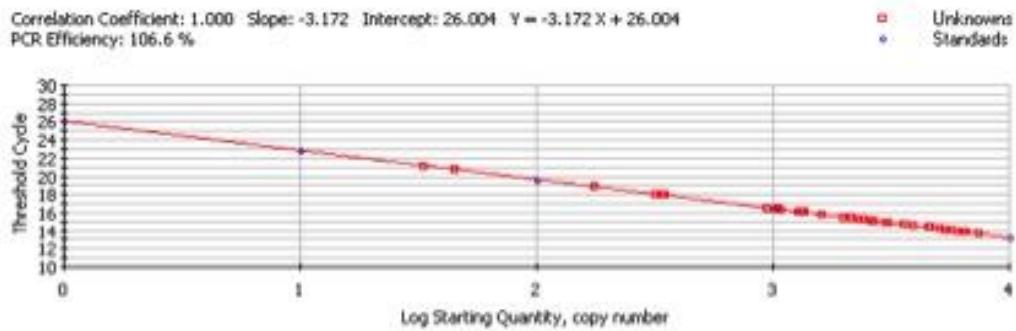

**Supplemental Tables**

Tables showing standard deviation on the PCR data graphed in Figure 8.

**Supplemental Table 1**

| LPL Control vs AM at 3 wks   | Variable 1      | Variable 2 |
|------------------------------|-----------------|------------|
| Mean                         | 0.020762        | 1.252387   |
| Variance                     | 0.000383        | 0.177107   |
| Observations                 | 3               | 3          |
| Pearson Correlation          | -0.97559        |            |
| Hypothesized Mean Difference | 0               |            |
| df                           | 2               |            |
| t Stat                       | -4.84867        |            |
| <b>P(T&lt;=t) one-tail</b>   | <b>0.020001</b> |            |
| t Critical one-tail          | 2.919986        |            |
| P(T<=t) two-tail             | 0.040001        |            |
| t Critical two-tail          | 4.302653        |            |

**Supplemental Table 2**

| PPAR2 Control vs AM at 3 wks | Variable 1      | Variable 2 |
|------------------------------|-----------------|------------|
| Mean                         | 0.009153        | 1.707977   |
| Variance                     | 1.87E-05        | 4.368772   |
| Observations                 | 3               | 3          |
| Pearson Correlation          | -0.73438        |            |
| Hypothesized Mean Difference | 0               |            |
| df                           | 2               |            |
| t Stat                       | -1.40562        |            |
| <b>P(T&lt;=t) one-tail</b>   | <b>0.147525</b> |            |
| t Critical one-tail          | 2.919986        |            |
| P(T<=t) two-tail             | 0.295051        |            |
| t Critical two-tail          | 4.302653        |            |

**Supplemental Table 3**

| FABP4 Control vs AM at 3 wks | Variable 1      | Variable 2 |
|------------------------------|-----------------|------------|
| Mean                         | 0.062508        | 1.005848   |
| Variance                     | 0.003381        | 0.812801   |
| Observations                 | 3               | 3          |
| Pearson Correlation          | -0.96972        |            |
| Hypothesized Mean Difference | 0               |            |
| df                           | 2               |            |
| t Stat                       | -1.70547        |            |
| <b>P(T&lt;=t) one-tail</b>   | <b>0.115112</b> |            |
| t Critical one-tail          | 2.919986        |            |
| P(T<=t) two-tail             | 0.230225        |            |
| t Critical two-tail          | 4.302653        |            |

**Supplemental Table 4**

| LPL Control vs AM at 6 wks   | Variable 1      | Variable 2 |
|------------------------------|-----------------|------------|
| Mean                         | 0.041073        | 0.49027    |
| Variance                     | 0.000941        | 0.103642   |
| Observations                 | 3               | 3          |
| Pearson Correlation          | 0.386994        |            |
| Hypothesized Mean Difference | 0               |            |
| df                           | 2               |            |
| t Stat                       | -2.49891        |            |
| <b>P(T&lt;=t) one-tail</b>   | <b>0.064852</b> |            |
| t Critical one-tail          | 2.919986        |            |
| P(T<=t) two-tail             | 0.129704        |            |
| t Critical two-tail          | 4.302653        |            |

**Supplemental Table 5**

| PPAR2 Control vs AM at 6 wks | Variable 1 | Variable 2 |
|------------------------------|------------|------------|
|------------------------------|------------|------------|



|                              |                |          |
|------------------------------|----------------|----------|
| Mean                         | 0.085042       | 0.439802 |
| Variance                     | 0.015255       | 0.131218 |
| Observations                 | 3              | 3        |
| Pearson Correlation          | 0.352993       |          |
| Hypothesized Mean Difference | 0              |          |
| df                           | 2              |          |
| t Stat                       | -1.81284       |          |
| <b>P(T&lt;=t) one-tail</b>   | <b>0.10577</b> |          |
| t Critical one-tail          | 2.919986       |          |
| P(T<=t) two-tail             | 0.211539       |          |
| t Critical two-tail          | 4.302653       |          |

### Supplemental Table 6

| FABP4 Control vs AM at 6 wks | Variable 1      | Variable 2 |
|------------------------------|-----------------|------------|
| Mean                         | 0.063073        | 0.434706   |
| Variance                     | 0.002398        | 0.107693   |
| Observations                 | 3               | 3          |
| Pearson Correlation          | 0.870406        |            |
| Hypothesized Mean Difference | 0               |            |
| df                           | 2               |            |
| t Stat                       | -2.24629        |            |
| <b>P(T&lt;=t) one-tail</b>   | <b>0.076873</b> |            |
| t Critical one-tail          | 2.919986        |            |
| P(T<=t) two-tail             | 0.153747        |            |
| t Critical two-tail          | 4.302653        |            |

### Supplemental Table 7

| RUNX2 Control vs OM at 3 wks | Variable 1      | Variable 2 |
|------------------------------|-----------------|------------|
| Mean                         | 0.557695        | 0.268591   |
| Variance                     | 0.231749        | 0.003094   |
| Observations                 | 3               | 3          |
| Pearson Correlation          | -0.83916        |            |
| Hypothesized Mean Difference | 0               |            |
| df                           | 2               |            |
| t Stat                       | 0.946686        |            |
| <b>P(T&lt;=t) one-tail</b>   | <b>0.221862</b> |            |
| t Critical one-tail          | 2.919986        |            |
| P(T<=t) two-tail             | 0.443724        |            |
| t Critical two-tail          | 4.302653        |            |

### Supplemental Table 8

| AP Control vs OM at 3 wks | Variable 1 | Variable 2 |
|---------------------------|------------|------------|
| Mean                      | 0.349271   | 0.213835   |
| Variance                  | 0.105966   | 0.003427   |

|                              |                 |   |
|------------------------------|-----------------|---|
| Observations                 | 3               | 3 |
| Pearson Correlation          | -0.21115        |   |
| Hypothesized Mean Difference | 0               |   |
| df                           | 2               |   |
| t Stat                       | 0.684517        |   |
| <b>P(T&lt;=t) one-tail</b>   | <b>0.282163</b> |   |
| t Critical one-tail          | 2.919986        |   |
| P(T<=t) two-tail             | 0.564326        |   |
| t Critical two-tail          | 4.302653        |   |

### Supplemental Table 9

| RUNX2 Control vs OM at 6 wks | Variable 1      | Variable 2 |
|------------------------------|-----------------|------------|
| Mean                         | 0.463116        | 0.790479   |
| Variance                     | 0.072851        | 0.527358   |
| Observations                 | 3               | 3          |
| Pearson Correlation          | 0.996095        |            |
| Hypothesized Mean Difference | 0               |            |
| df                           | 2               |            |
| t Stat                       | -1.23812        |            |
| <b>P(T&lt;=t) one-tail</b>   | <b>0.170644</b> |            |
| t Critical one-tail          | 2.919986        |            |
| P(T<=t) two-tail             | 0.341289        |            |
| t Critical two-tail          | 4.302653        |            |

### Supplemental Table 10

| AP Control vs OM at 3 wks    | Variable 1      | Variable 2 |
|------------------------------|-----------------|------------|
| Mean                         | 0.500895        | 0.510108   |
| Variance                     | 0.091036        | 0.01932    |
| Observations                 | 3               | 3          |
| Pearson Correlation          | 0.875071        |            |
| Hypothesized Mean Difference | 0               |            |
| df                           | 2               |            |
| t Stat                       | -0.083          |            |
| <b>P(T&lt;=t) one-tail</b>   | <b>0.470706</b> |            |
| t Critical one-tail          | 2.919986        |            |
| P(T<=t) two-tail             | 0.941411        |            |
| t Critical two-tail          | 4.302653        |            |

### Supplemental Table 11

| Collagen I Control vs CM at 3 wks | Variable 1         | Variable 2  |
|-----------------------------------|--------------------|-------------|
| Mean                              | 0.14170997         | 0.136470011 |
| Variance                          | 0.037593371        | 0.012706905 |
| Observations                      | 3                  | 3           |
| Pearson Correlation               | 0.959839588        |             |
| Hypothesized Mean Difference      | 0                  |             |
| df                                | 2                  |             |
| t Stat                            | 0.09936183         |             |
| <b>P(T&lt;=t) one-tail</b>        | <b>0.464956675</b> |             |
| t Critical one-tail               | 2.91998558         |             |

|                     |             |
|---------------------|-------------|
| P(T<=t) two-tail    | 0.929913351 |
| t Critical two-tail | 4.30265273  |

### Supplemental Table 12

| Collagen I Control vs CM at 3 wks | Variable 1 | Variable 2 |
|-----------------------------------|------------|------------|
| Mean                              | 0.594373   | 1.508529   |
| Variance                          | 0.228741   | 1.918067   |
| Observations                      | 3          | 3          |
| Pearson Correlation               | 0.644261   |            |
| Hypothesized Mean Difference      | 0          |            |
| df                                | 2          |            |
| t Stat                            | -1.39228   |            |
| P(T<=t) one-tail                  | 0.14922    |            |
| t Critical one-tail               | 2.919986   |            |
| P(T<=t) two-tail                  | 0.29844    |            |
| t Critical two-tail               | 4.302653   |            |

### Supplemental Table 13

| Aggrecan Control vs CM at 3 wks | Variable 1 | Variable 2 |
|---------------------------------|------------|------------|
| Mean                            | 0.356179   | 0.619536   |
| Variance                        | 0.034008   | 0.282747   |
| Observations                    | 3          | 3          |
| Pearson Correlation             | 0.554147   |            |
| Hypothesized Mean Difference    | 0          |            |
| df                              | 2          |            |
| t Stat                          | -0.99999   |            |
| P(T<=t) one-tail                | 0.211327   |            |
| t Critical one-tail             | 2.919986   |            |
| P(T<=t) two-tail                | 0.422655   |            |
| t Critical two-tail             | 4.302653   |            |

### Supplemental Table 14

| Collagen I Control vs CM at 6 wks | Variable 1  | Variable 2  |
|-----------------------------------|-------------|-------------|
| Mean                              | 0.020490384 | 0.059263853 |
| Variance                          | 0.000236223 | 0.003261218 |
| Observations                      | 3           | 3           |
| Pearson Correlation               | 0.151695379 |             |
| Hypothesized Mean Difference      | 0           |             |
| df                                | 2           |             |
| t Stat                            | -1.1814533  |             |
| P(T<=t) one-tail                  | 0.179436943 |             |
| t Critical one-tail               | 2.91998558  |             |
| P(T<=t) two-tail                  | 0.358873885 |             |
| t Critical two-tail               | 4.30265273  |             |

### Supplemental Table 15

| Collagen II Control vs CM at 6 wks | Variable 1 | Variable 2 |
|------------------------------------|------------|------------|
| Mean                               | 2.332844   | 21.35508   |



|                              |                 |          |
|------------------------------|-----------------|----------|
| Variance                     | 3.469658        | 1324.319 |
| Observations                 | 3               | 3        |
| Pearson Correlation          | 0.823733        |          |
| Hypothesized Mean Difference | 0               |          |
| df                           | 2               |          |
| t Stat                       | -0.94479        |          |
| <b>P(T&lt;=t) one-tail</b>   | <b>0.222247</b> |          |
| t Critical one-tail          | 2.919986        |          |
| P(T<=t) two-tail             | 0.444494        |          |
| t Critical two-tail          | 4.302653        |          |

**Supplemental Table 16**

| Aggrecan Control vs CM at 6 wks | Variable 1      | Variable 2 |
|---------------------------------|-----------------|------------|
| Mean                            | 0.984337        | 8.19944    |
| Variance                        | 1.056371        | 180.5887   |
| Observations                    | 3               | 3          |
| Pearson Correlation             | 0.939871        |            |
| Hypothesized Mean Difference    | 0               |            |
| df                              | 2               |            |
| t Stat                          | -1.00158        |            |
| <b>P(T&lt;=t) one-tail</b>      | <b>0.211022</b> |            |
| t Critical one-tail             | 2.919986        |            |
| P(T<=t) two-tail                | 0.422044        |            |
| t Critical two-tail             | 4.302653        |            |

**Supplemental Table 17**

Standard Curve PCR Data for Adipogenic Differentiation Markers

Data Analysis Parameters

Calculated threshold using the **maximum correlation coefficient approach** is **685.4**.

Per-well baseline cycles have been determined automatically.

Data analysis window is set at **95.00%** of a cycle, centered at **end** of the cycle.

**Weighted Mean** digital filtering has been applied. Global filtering is **off**.

| Type | Identifier | Rep | Ct    | Log | SQ    | SQ       | SQ       | Ct  | Ct    | Set |
|------|------------|-----|-------|-----|-------|----------|----------|-----|-------|-----|
| A02  | Standard   | 1   | 9.79  |     | 5.000 | 1.00E+05 | 1.00E+05 | N/A | 9.79  | N/A |
| A03  | Standard   | 2   | 12.40 |     | 4.000 | 1.00E+04 | 1.00E+04 | N/A | 12.40 | N/A |
| A04  | Standard   | 3   | 15.66 |     | 3.000 | 1.00E+03 | 1.00E+03 | N/A | 15.66 | N/A |
| A05  | Standard   | 4   | 19.14 |     | 2.000 | 1.00E+02 | 1.00E+02 | N/A | 19.14 | N/A |
| A06  | Standard   | 5   | 22.80 |     |       | 1.00E+01 | 1.00E+01 | N/A | 22.80 | N/A |

|     |          |    |       |       |          |          |     |       |     |
|-----|----------|----|-------|-------|----------|----------|-----|-------|-----|
| A07 | Standard | 6  | 26.06 | 1.000 | 1.00E+00 | 1.00E+00 | N/A | 26.06 | N/A |
| A08 | Unknown  | 1  | 16.77 | 0.000 | 5.80E+02 | 5.80E+02 | N/A | 16.77 | N/A |
| A09 | Unknown  | 2  | 17.32 | 2.763 | 3.97E+02 | 3.97E+02 | N/A | 17.32 | N/A |
| A10 | Unknown  | 3  | 15.49 | 2.599 | 1.41E+03 | 1.41E+03 | N/A | 15.49 | N/A |
| A11 | Unknown  | 4  | 15.55 | 3.149 | 1.35E+03 | 1.35E+03 | N/A | 15.55 | N/A |
| B01 | Unknown  | 5  | 15.29 | 3.131 | 1.63E+03 | 1.63E+03 | N/A | 15.29 | N/A |
| B02 | Unknown  | 6  | 15.12 | 3.211 | 1.83E+03 | 1.83E+03 | N/A | 15.12 | N/A |
| B03 | Unknown  | 7  | 14.84 | 3.262 | 2.22E+03 | 2.22E+03 | N/A | 14.84 | N/A |
| B04 | Unknown  | 8  | 14.56 | 3.346 | 2.69E+03 | 2.69E+03 | N/A | 14.56 | N/A |
| B05 | Unknown  | 9  | 14.12 | 3.431 | 3.66E+03 | 3.66E+03 | N/A | 14.12 | N/A |
| B06 | Unknown  | 10 | 14.61 | 3.563 | 2.61E+03 | 2.61E+03 | N/A | 14.61 | N/A |
| B07 | Unknown  | 11 | 13.03 | 3.416 | 7.80E+03 | 7.80E+03 | N/A | 13.03 | N/A |
| B08 | Unknown  | 12 | 13.07 | 3.892 | 7.58E+03 | 7.58E+03 | N/A | 13.07 | N/A |
| B09 | Unknown  | 13 | 13.21 | 3.880 | 6.90E+03 | 6.90E+03 | N/A | 13.21 | N/A |
| B10 | Unknown  | 14 | 13.17 | 3.839 | 7.05E+03 | 7.05E+03 | N/A | 13.17 | N/A |
| B11 | Unknown  | 15 | 13.74 | 3.848 | 4.76E+03 | 4.76E+03 | N/A | 13.74 | N/A |
|     |          |    |       | 3.678 |          |          |     |       |     |

### Supplemental Table 18

Standard Curve PCR Data for Osteogenic Differentiation Markers

#### Data Analysis Parameters

Calculated threshold using the **maximum correlation coefficient approach** is **539.5**.

Per-well baseline cycles have been determined automatically.

Data analysis window is set at **95.00%** of a cycle, centered at **end** of the cycle.

**Weighted Mean** digital filtering has been applied. Global filtering is **off**.

| Type | Identifier | Rep | Ct    | Log | SQ    | SQ       | SQ       | Ct  | Ct    | Set |
|------|------------|-----|-------|-----|-------|----------|----------|-----|-------|-----|
| A02  | Standard   | 1   | 10.15 |     | 5.000 | 1.00E+05 | 1.00E+05 | N/A | 10.15 | N/A |
| A03  | Standard   | 2   | 12.75 |     | 4.000 | 1.00E+04 | 1.00E+04 | N/A | 12.75 | N/A |
| A04  | Standard   | 3   | 16.04 |     | 3.000 | 1.00E+03 | 1.00E+03 | N/A | 16.04 | N/A |
| A05  | Standard   | 4   | 18.99 |     | 2.000 | 1.00E+02 | 1.00E+02 | N/A | 18.99 | N/A |
| A06  | Standard   | 5   | 22.40 |     |       | 1.00E+01 | 1.00E+01 | N/A | 22.40 | N/A |

|     |          |    |       |       |          |          |     |       |     |  |
|-----|----------|----|-------|-------|----------|----------|-----|-------|-----|--|
|     |          |    |       | 1.000 |          |          |     |       |     |  |
| A07 | Standard | 6  | 25.75 | 0.000 | 1.00E+00 | 1.00E+00 | N/A | 25.75 | N/A |  |
| A08 | Unknown  | 1  | 17.13 | 2.676 | 4.75E+02 | 4.75E+02 | N/A | 17.13 | N/A |  |
| A09 | Unknown  | 2  | 17.62 | 2.519 | 3.31E+02 | 3.31E+02 | N/A | 17.62 | N/A |  |
| A10 | Unknown  | 3  | 15.73 | 3.121 | 1.32E+03 | 1.32E+03 | N/A | 15.73 | N/A |  |
| A11 | Unknown  | 4  | 16.33 | 2.930 | 8.51E+02 | 8.51E+02 | N/A | 16.33 | N/A |  |
| B01 | Unknown  | 5  | 14.98 | 3.360 | 2.29E+03 | 2.29E+03 | N/A | 14.98 | N/A |  |
| B02 | Unknown  | 6  | 13.64 | 3.788 | 6.13E+03 | 6.13E+03 | N/A | 13.64 | N/A |  |
| B03 | Unknown  | 7  | 15.27 | 3.269 | 1.86E+03 | 1.86E+03 | N/A | 15.27 | N/A |  |
| B04 | Unknown  | 8  | 15.24 | 3.278 | 1.90E+03 | 1.90E+03 | N/A | 15.24 | N/A |  |
| B05 | Unknown  | 9  | 18.47 | 2.247 | 1.77E+02 | 1.77E+02 | N/A | 18.47 | N/A |  |
| B06 | Unknown  | 10 | 17.94 | 2.418 | 2.62E+02 | 2.62E+02 | N/A | 17.94 | N/A |  |
| B07 | Unknown  | 11 | 13.82 | 3.729 | 5.36E+03 | 5.36E+03 | N/A | 13.82 | N/A |  |
| B08 | Unknown  | 12 | 14.00 | 3.671 | 4.69E+03 | 4.69E+03 | N/A | 14.00 | N/A |  |
| B09 | Unknown  | 13 | 15.20 | 3.288 | 1.94E+03 | 1.94E+03 | N/A | 15.20 | N/A |  |
| B10 | Unknown  | 14 | 15.22 | 3.284 | 1.92E+03 | 1.92E+03 | N/A | 15.22 | N/A |  |
| B11 | Unknown  | 15 | 15.39 | 3.230 | 1.70E+03 | 1.70E+03 | N/A | 15.39 | N/A |  |
| B12 | Unknown  | 16 | 15.63 | 3.154 | 1.42E+03 | 1.42E+03 | N/A | 15.63 | N/A |  |
| C01 | Unknown  | 17 | 14.99 | 3.358 | 2.28E+03 | 2.28E+03 | N/A | 14.99 | N/A |  |
| C02 | Unknown  | 18 | 15.29 | 3.261 | 1.83E+03 | 1.83E+03 | N/A | 15.29 | N/A |  |
| C03 | Unknown  | 19 | 13.09 | 3.961 | 9.14E+03 | 9.14E+03 | N/A | 13.09 | N/A |  |
| C04 | Unknown  | 20 | 13.48 | 3.838 | 6.89E+03 | 6.89E+03 | N/A | 13.48 | N/A |  |
| C05 | Unknown  | 21 | 13.92 | 3.697 | 4.98E+03 | 4.98E+03 | N/A | 13.92 | N/A |  |
| C06 | Unknown  | 22 | 13.85 | 3.718 | 5.23E+03 | 5.23E+03 | N/A | 13.85 | N/A |  |
| C07 | Unknown  | 23 | 15.74 | 3.117 | 1.31E+03 | 1.31E+03 | N/A | 15.74 | N/A |  |
| C08 | Unknown  | 24 | 15.84 | 3.087 | 1.22E+03 | 1.22E+03 | N/A | 15.84 | N/A |  |
| C09 | Unknown  | 25 | 18.22 | 2.327 | 2.13E+02 | 2.13E+02 | N/A | 18.22 | N/A |  |
| C10 | Unknown  | 26 | 18.57 | 2.216 | 1.65E+02 | 1.65E+02 | N/A | 18.57 | N/A |  |

|     |          |    |       |       |          |          |     |       |     |
|-----|----------|----|-------|-------|----------|----------|-----|-------|-----|
| C11 | Unknown  | 27 | 13.95 | 3.687 | 4.87E+03 | 4.87E+03 | N/A | 13.95 | N/A |
| C12 | Unknown  | 28 | 14.09 | 3.643 | 4.40E+03 | 4.40E+03 | N/A | 14.09 | N/A |
| D01 | Unknown  | 29 | 14.85 | 3.402 | 2.53E+03 | 2.53E+03 | N/A | 14.85 | N/A |
| D02 | Unknown  | 30 | 14.91 | 3.382 | 2.41E+03 | 2.41E+03 | N/A | 14.91 | N/A |
| D03 | Unknown  | 31 | 13.79 | 3.739 | 5.48E+03 | 5.48E+03 | N/A | 13.79 | N/A |
| D04 | Unknown  | 32 | 14.18 | 3.616 | 4.13E+03 | 4.13E+03 | N/A | 14.18 | N/A |
| D05 | Unknown  | 33 | 13.97 | 3.682 | 4.81E+03 | 4.81E+03 | N/A | 13.97 | N/A |
| D06 | Unknown  | 34 | 14.33 | 3.565 | 3.67E+03 | 3.67E+03 | N/A | 14.33 | N/A |
| D07 | Unknown  | 35 | 13.04 | 3.978 | 9.50E+03 | 9.50E+03 | N/A | 13.04 | N/A |
| D08 | Unknown  | 36 | 12.89 | 4.024 | 1.06E+04 | 1.06E+04 | N/A | 12.89 | N/A |
| D09 | Unknown  | 37 | 14.31 | 3.573 | 3.74E+03 | 3.74E+03 | N/A | 14.31 | N/A |
| D10 | Unknown  | 38 | 14.21 | 3.604 | 4.02E+03 | 4.02E+03 | N/A | 14.21 | N/A |
| A02 | Standard | 1  | 10.15 | 5.000 | 1.00E+05 | 1.00E+05 | N/A | 10.15 | N/A |
| A03 | Standard | 2  | 12.75 | 4.000 | 1.00E+04 | 1.00E+04 | N/A | 12.75 | N/A |
| A04 | Standard | 3  | 16.04 | 3.000 | 1.00E+03 | 1.00E+03 | N/A | 16.04 | N/A |

### Supplemental Table 19

Standard Curve PCR Data for Chondrogenic Differentiation Markers

#### Data Analysis Parameters

Calculated threshold using the **maximum correlation coefficient approach** is **1,081.1**.

Per-well baseline cycles have been determined automatically.

Data analysis window is set at **95.00%** of a cycle, centered at **end** of the cycle.

**Weighted Mean** digital filtering has been applied. Global filtering is **off**.

| Type | Identifier | Rep | Ct    | Log | SQ    | SQ       | SQ       | Ct  | Ct    | Set |
|------|------------|-----|-------|-----|-------|----------|----------|-----|-------|-----|
| A03  | Standard   | 2   | 13.32 |     | 4.000 | 1.00E+04 | 1.00E+04 | N/A | 13.32 | N/A |
| A04  | Standard   | 3   | 16.56 |     | 3.000 | 1.00E+03 | 1.00E+03 | N/A | 16.56 | N/A |
| A05  | Standard   | 4   | 19.55 |     | 2.000 | 1.00E+02 | 1.00E+02 | N/A | 19.55 | N/A |
| A06  | Standard   | 5   | 22.79 |     | 1.000 | 1.00E+01 | 1.00E+01 | N/A | 22.79 | N/A |

|     |          |    |       |       |          |          |     |       |     |
|-----|----------|----|-------|-------|----------|----------|-----|-------|-----|
| A07 | Standard | 6  | 26.07 | 0.000 | 1.00E+00 | 1.00E+00 | N/A | 26.07 | N/A |
| A08 | Unknown  | 1  | 18.88 | 2.245 | 1.76E+02 | 1.76E+02 | N/A | 18.88 | N/A |
| A09 | Unknown  | 2  | 17.96 | 2.537 | 3.44E+02 | 3.44E+02 | N/A | 17.96 | N/A |
| A10 | Unknown  | 3  | 15.35 | 3.359 | 2.28E+03 | 2.28E+03 | N/A | 15.35 | N/A |
| A11 | Unknown  | 4  | 15.54 | 3.298 | 1.99E+03 | 1.99E+03 | N/A | 15.54 | N/A |
| B01 | Unknown  | 5  | 14.00 | 3.783 | 6.06E+03 | 6.06E+03 | N/A | 14.00 | N/A |
| B02 | Unknown  | 6  | 16.38 | 3.032 | 1.08E+03 | 1.08E+03 | N/A | 16.38 | N/A |
| B03 | Unknown  | 7  | 15.13 | 3.429 | 2.68E+03 | 2.68E+03 | N/A | 15.13 | N/A |
| B04 | Unknown  | 8  | 15.54 | 3.299 | 1.99E+03 | 1.99E+03 | N/A | 15.54 | N/A |
| B05 | Unknown  | 9  | 18.08 | 2.498 | 3.15E+02 | 3.15E+02 | N/A | 18.08 | N/A |
| B06 | Unknown  | 10 | 17.96 | 2.535 | 3.43E+02 | 3.43E+02 | N/A | 17.96 | N/A |
| B07 | Unknown  | 11 | 16.15 | 3.106 | 1.28E+03 | 1.28E+03 | N/A | 16.15 | N/A |
| B08 | Unknown  | 12 | 16.08 | 3.129 | 1.35E+03 | 1.35E+03 | N/A | 16.08 | N/A |
| B09 | Unknown  | 13 | 15.43 | 3.332 | 2.15E+03 | 2.15E+03 | N/A | 15.43 | N/A |
| B10 | Unknown  | 14 | 16.10 | 3.121 | 1.32E+03 | 1.32E+03 | N/A | 16.10 | N/A |
| B11 | Unknown  | 15 | 20.77 | 1.650 | 4.47E+01 | 4.47E+01 | N/A | 20.77 | N/A |
| B12 | Unknown  | 16 | 21.19 | 1.517 | 3.29E+01 | 3.29E+01 | N/A | 21.19 | N/A |
| C01 | Unknown  | 17 | 16.09 | 3.124 | 1.33E+03 | 1.33E+03 | N/A | 16.09 | N/A |
| C02 | Unknown  | 18 | 15.84 | 3.205 | 1.60E+03 | 1.60E+03 | N/A | 15.84 | N/A |
| C03 | Unknown  | 19 | 14.18 | 3.727 | 5.33E+03 | 5.33E+03 | N/A | 14.18 | N/A |
| C04 | Unknown  | 20 | 14.37 | 3.666 | 4.63E+03 | 4.63E+03 | N/A | 14.37 | N/A |
| C05 | Unknown  | 21 | 14.01 | 3.781 | 6.03E+03 | 6.03E+03 | N/A | 14.01 | N/A |
| C06 | Unknown  | 22 | 14.26 | 3.701 | 5.02E+03 | 5.02E+03 | N/A | 14.26 | N/A |
| C07 | Unknown  | 23 | 15.18 | 3.413 | 2.59E+03 | 2.59E+03 | N/A | 15.18 | N/A |
| C08 | Unknown  | 24 | 15.18 | 3.413 | 2.59E+03 | 2.59E+03 | N/A | 15.18 | N/A |
| C09 | Unknown  | 25 | 16.57 | 2.974 | 9.42E+02 | 9.42E+02 | N/A | 16.57 | N/A |
| C10 | Unknown  | 26 | 16.43 | 3.018 | 1.04E+03 | 1.04E+03 | N/A | 16.43 | N/A |
| C11 | Unknown  | 27 | 13.93 | 3.804 | 6.37E+03 | 6.37E+03 | N/A | 13.93 | N/A |

---

|     |         |    |       |       |          |          |     |       |     |
|-----|---------|----|-------|-------|----------|----------|-----|-------|-----|
| C12 | Unknown | 28 | 14.41 | 3.656 | 4.53E+03 | 4.53E+03 | N/A | 14.41 | N/A |
| D01 | Unknown | 29 | 14.39 | 3.660 | 4.57E+03 | 4.57E+03 | N/A | 14.39 | N/A |
| D02 | Unknown | 30 | 13.90 | 3.814 | 6.52E+03 | 6.52E+03 | N/A | 13.90 | N/A |
| D03 | Unknown | 31 | 14.95 | 3.484 | 3.05E+03 | 3.05E+03 | N/A | 14.95 | N/A |
| D04 | Unknown | 32 | 15.27 | 3.384 | 2.42E+03 | 2.42E+03 | N/A | 15.27 | N/A |
| D05 | Unknown | 33 | 14.41 | 3.655 | 4.52E+03 | 4.52E+03 | N/A | 14.41 | N/A |
| D06 | Unknown | 34 | 14.98 | 3.475 | 2.99E+03 | 2.99E+03 | N/A | 14.98 | N/A |
| D07 | Unknown | 35 | 14.08 | 3.757 | 5.72E+03 | 5.72E+03 | N/A | 14.08 | N/A |
| D08 | Unknown | 36 | 13.73 | 3.867 | 7.37E+03 | 7.37E+03 | N/A | 13.73 | N/A |
| D09 | Unknown | 37 | 14.73 | 3.553 | 3.58E+03 | 3.58E+03 | N/A | 14.73 | N/A |
| D10 | Unknown | 38 | 14.62 | 3.590 | 3.89E+03 | 3.89E+03 | N/A | 14.62 | N/A |

---
